# Supplementary material for: Lysosomal dysfunction and autophagy blockade contribute to IMB-6G-induced apoptosis in pancreatic cancer cells
Source: PubMed Central journal article supplement (PMC5282566; doi:10.1038/srep41862), 2017-01-31

## Supplementary Information

### **Lysosomal dysfunction and autophagy blockade contribute to IMB-6G-induced apoptosis in pancreatic cancer cells**

Lu Liu , Na Zhang , Yueying Dou , Genxiang Mao , Chongwen Bi , Weiqiang Pang ,  
Xiaojia Liu , Danqing Song <sup>\*</sup> , Hongbin Deng <sup>\*</sup>

### Supplementary Figure Legends

**Supplementary Figure S1. IMB-6G induces apoptosis in MiaPaCa-2 and HupT-3 cells.** (a) MiaPaCa-2 and HupT-3 cells were stained with Annexin V-FITC and PI after incubated with 3 $\mu$ M of IMB-6G for 24 h, the numbers of apoptotic cells were analyzed in flow cytometry. (b) Statistical analysis result of flow cytometric analysis of apoptosis. Annexin V-positive cells were accepted as apoptotic cells. The results are presented as mean  $\pm$  SD and represent three individual experiments. **\*\* $p$ <0.01** compared with control group.

**Supplementary Figure S2. Silence of Atg5 reduced IMB-6G-induced autophagosomal formation.** (a) MiaPaCa-2-GFP-LC3 cells transfected with control siRNA or Atg5 siRNA, were treated with IMB-6G (5  $\mu$ M) for 6 h. The cells were fixed and analyzed for fluorescence microscopy. Original magnification:  $\times$ 40. (b) GFP-LC3 puncta per cell were counted. Data are the mean  $\pm$  SD for triplicate samples of at least 100 cells per sample. **\* $p$  < 0.05** compared with control group.

**Supplementary Figure S3. IMB-6G selectively induced growth inhibition and apoptosis in pancreatic cancer cells.** (a) MiaPaca-2, HupT-3 cells and normal

pancreatic ductal epithelial cell HPDE6-C7 cells were treated with 5 $\mu$ M IMB-6G for the indicated time, the growth inhibition of cells was measured by MTT assay. **(b)** MiaPaca-2, HupT-3 cells and HPDE6-C7 cells were treated with IMB-6G at the indicated concentrations for 24 h, and whole-cell lysates were subjected to immunoblotting with an anti-PARP1 antibody. PARP1 cleavage was used as an apoptosis marker.

a

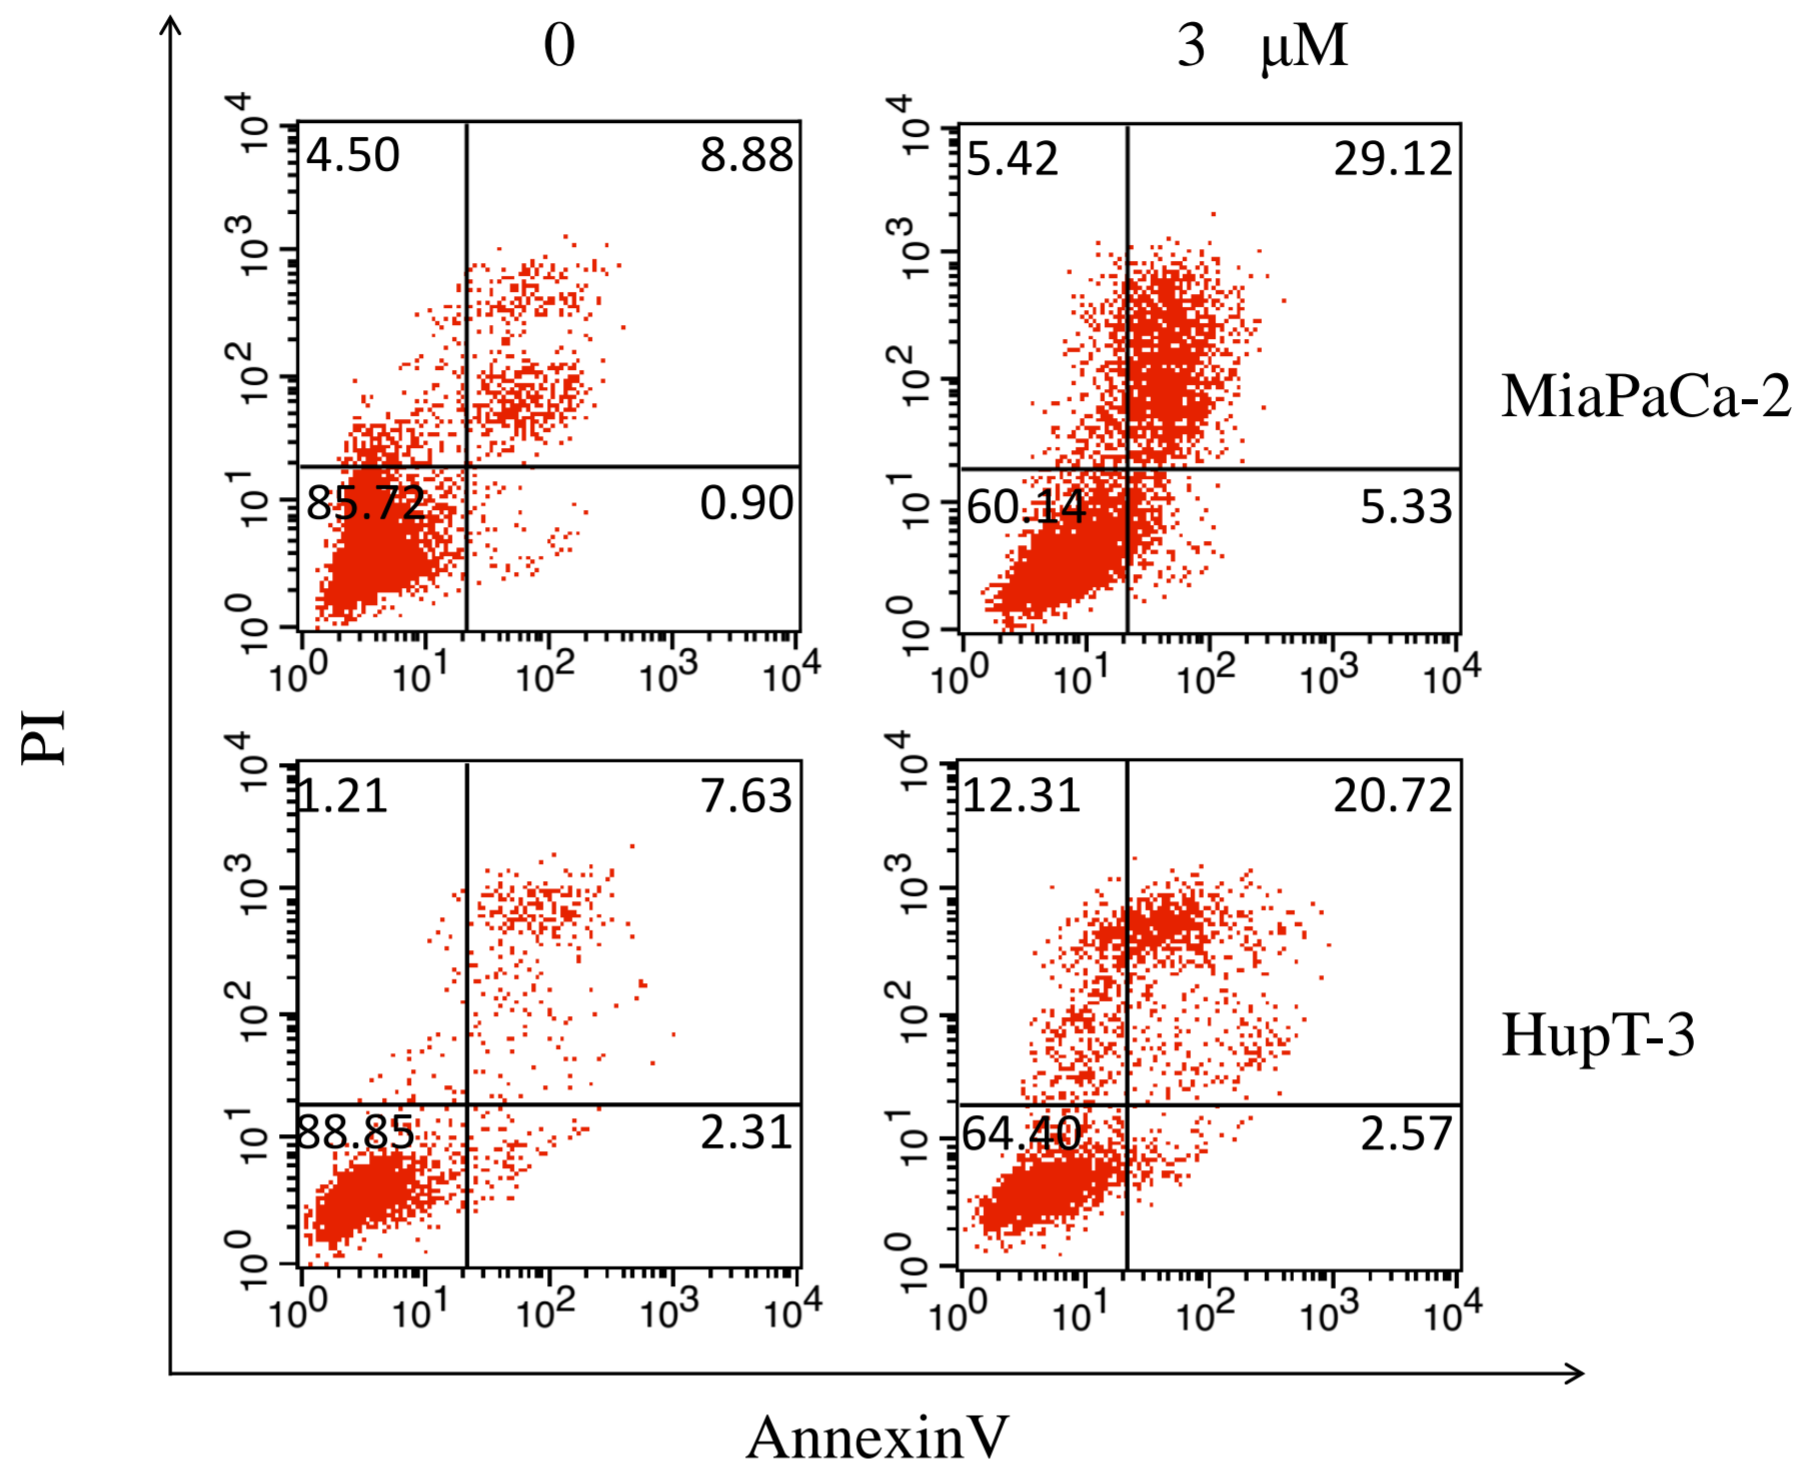

b

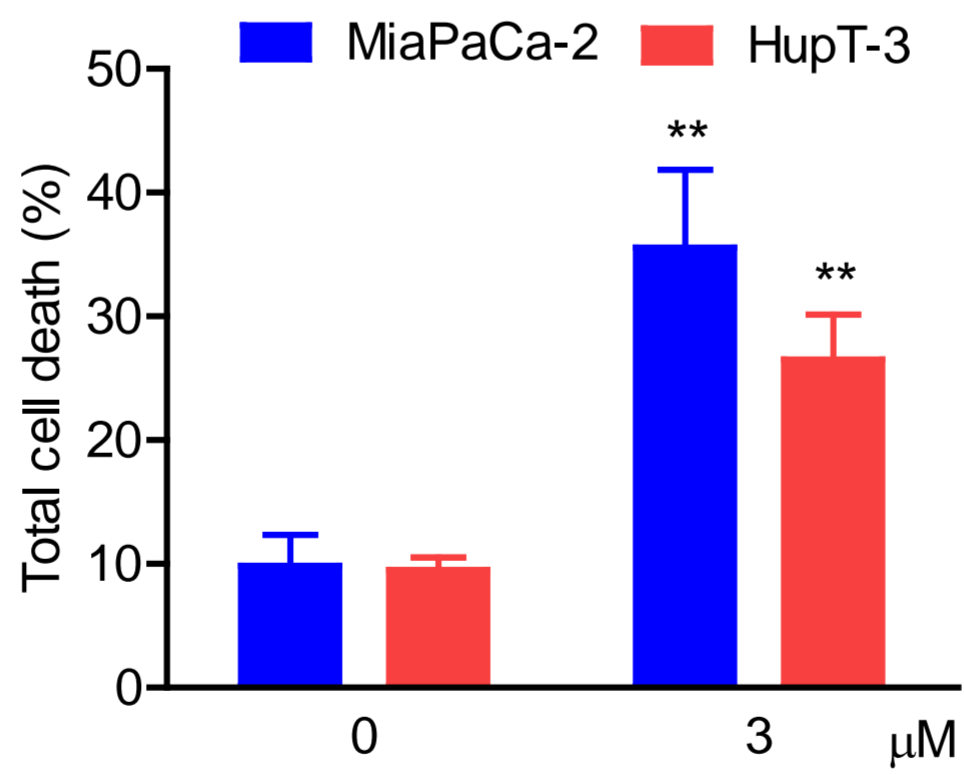

a

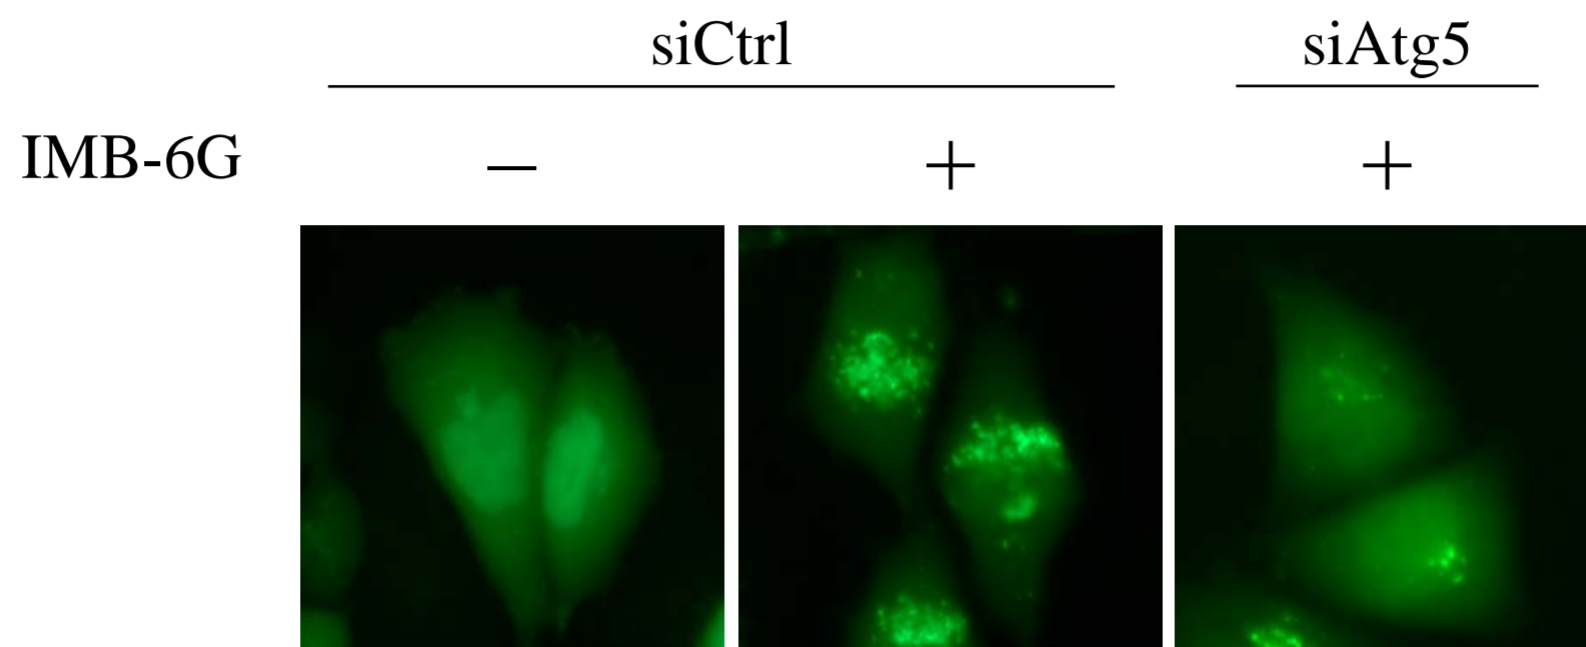

b

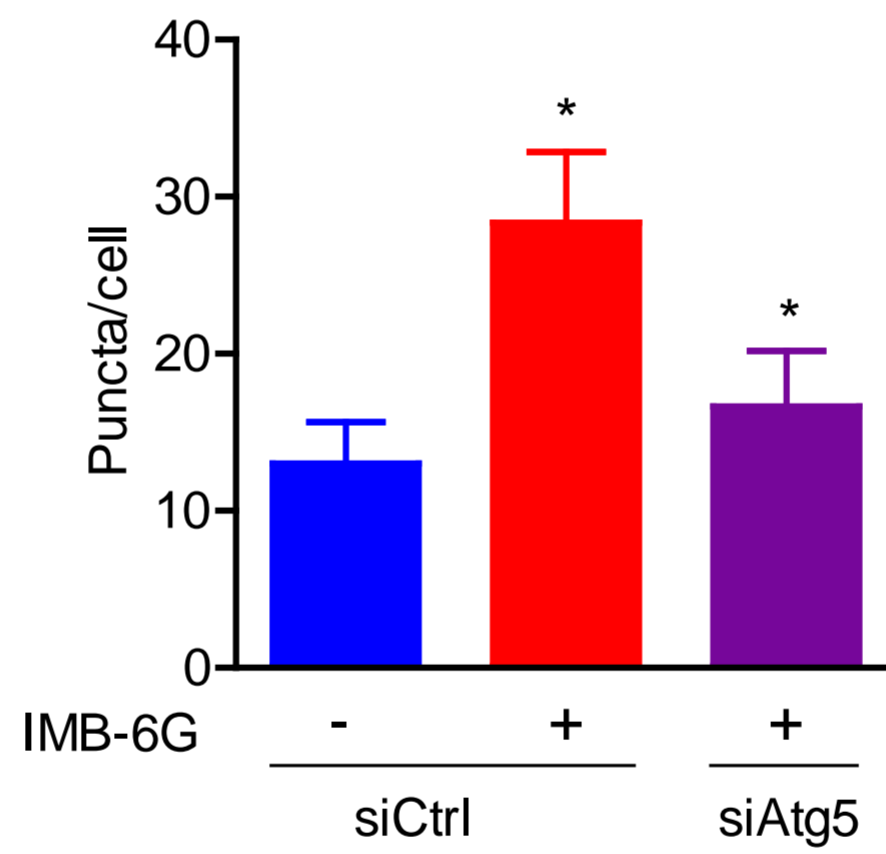

a

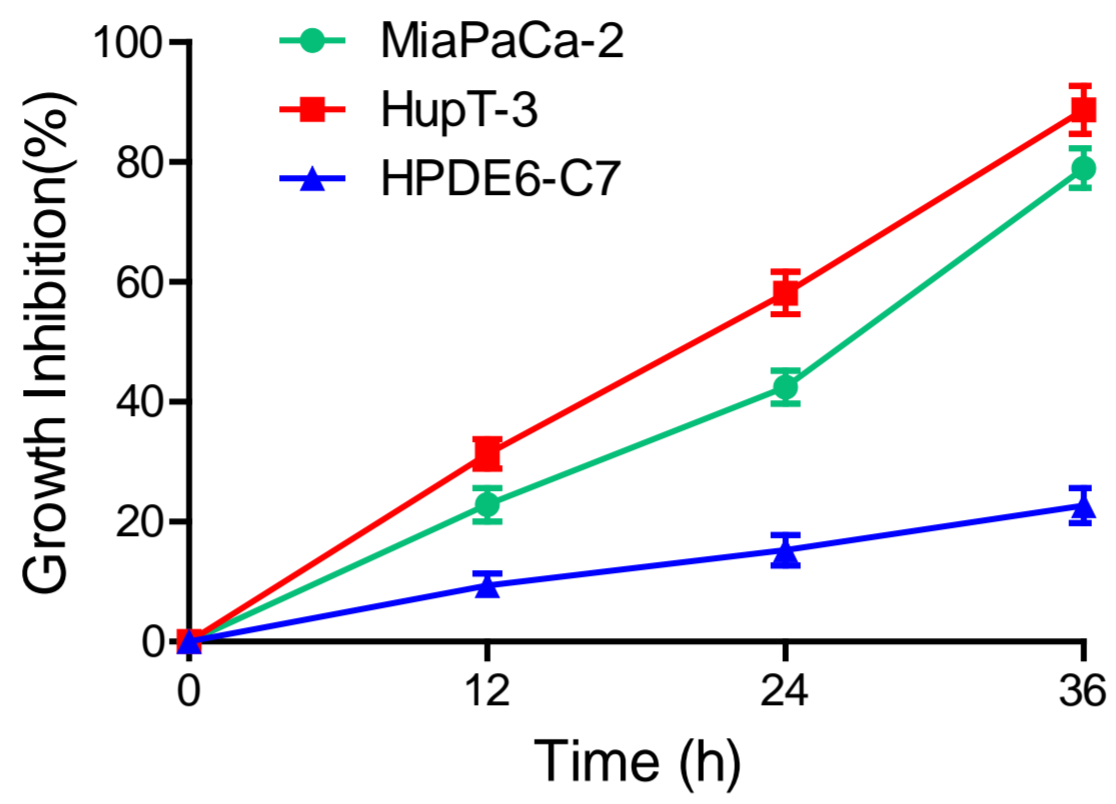

b

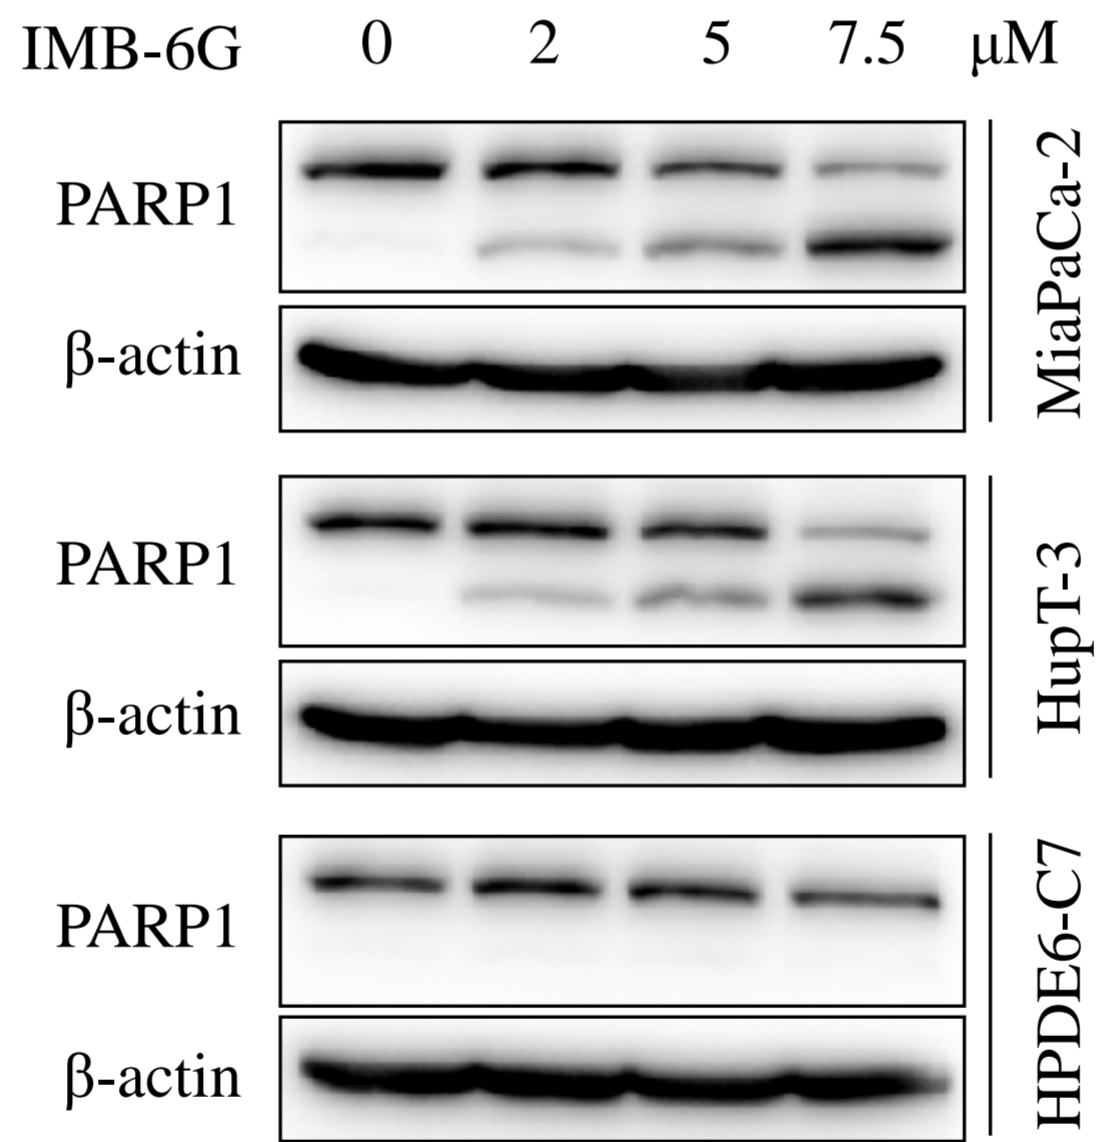

Supplement: srep41862-s1.pdf [file srep41862-s1.pdf]
